# Supplementary material for: New Insights into the Structure and Assembly of Bacteriophage P1
Source: MDPI journal article supplement (doi:10.3390/v14040678), 2022-03-25
Supplement: s1 [file s1]

### **Supplementary Material**

**Supplementary Table S1.** Strains and plasmids used in this study.

| <b>Strains, Phages, or Plasmids</b> | <b>Genotype or Relevant Characteristics</b>                                                                                                                             | <b>Reference/Source</b>                               |
|-------------------------------------|-------------------------------------------------------------------------------------------------------------------------------------------------------------------------|-------------------------------------------------------|
| <i>E. coli</i>                      |                                                                                                                                                                         |                                                       |
| BW25113(pKD46)                      | F-, $\Delta(araD-araB)567$ , $\Delta lacZ4787(::rrnB-3)$ , $\lambda$ , <i>rph-1</i> , $\Delta(rhaD-rhaB)568$ , <i>hsdR514</i> , pKD46                                   | The Coli Genetic Stock Center, Yale University (CGSC) |
| MG1655                              | <i>lacI<sup>ts</sup>tonA::Tn10</i>                                                                                                                                      | Lab stock                                             |
| WA921                               | F-, <i>thr-1</i> , <i>leuB6</i> (Am), <i>fhuA21</i> , <i>lacY1</i> or $\Delta(cod-lacI)6$ , <i>glnX44</i> (AS), $\lambda$ , <i>metB1</i> , <i>thiE1?</i> , <i>hsdS3</i> | CGSC                                                  |
| W3110                               | F-, $\lambda$ , <i>IN(rrnD-rrnE)1</i> , <i>rph-1</i>                                                                                                                    | CGSC                                                  |
| WA2379                              | F-, <i>leuB6</i> (Am), <i>fhuA21</i> , <i>lacY1</i> or $\Delta(cod-lacI)6$ , <i>glnX44</i> (AS), $\lambda$ , <i>metB1</i> , <i>thiE1?</i> , <i>deoB20</i>               | CGSC                                                  |
| WA960                               | F-, <i>leuB6</i> (Am), <i>fhuA21</i> , <i>lacY1</i> or $\Delta(cod-lacI)6$ , <i>glnX44</i> (AS), $\lambda$ , <i>metB1</i> , <i>thiE1?</i> , [ <i>r+B,m+B</i> ]          | CGSC                                                  |
| 5-alpha competent                   | Used for its high efficiency transformation                                                                                                                             | New England Biolabs                                   |
| <b>Phages</b>                       |                                                                                                                                                                         |                                                       |
| P1CMclr100                          | <i>Clr100</i> ts; Chloramphenicol resistant                                                                                                                             | CGSC                                                  |
| P1 $\Delta$ <i>darB</i>             | In-frame deletion of <i>darB</i> in P1CMclr100                                                                                                                          | Piya et al., 2017                                     |
| P1 $\Delta$ <i>pmgA</i>             | In-frame deletion of <i>pmgA</i> in P1CMclr100                                                                                                                          | This Work                                             |
| P1 $\Delta$ <i>pmgB</i>             | In-frame deletion of <i>pmgB</i> in P1CMclr100                                                                                                                          | This Work                                             |
| P1 $\Delta$ <i>pmgC</i>             | In-frame deletion of <i>pmgC</i> in P1CMclr100                                                                                                                          | This Work                                             |
| P1 $\Delta$ <i>pmgG</i>             | In-frame deletion of <i>pmgG</i> in P1CMclr100                                                                                                                          | This Work                                             |
| P1 $\Delta$ <i>pmgR</i>             | In-frame deletion of <i>pmgR</i> in P1CMclr100                                                                                                                          | This Work                                             |
| P1 $\Delta$ <i>pmgF</i>             | In-frame deletion of <i>pmgF</i> in P1CMclr100                                                                                                                          | This Work                                             |
| P1 $\Delta$ <i>pmgL</i>             | In-frame deletion of <i>pmgL</i> in P1CMclr100                                                                                                                          | This Work                                             |
| P1 $\Delta$ <i>pmgM</i>             | In-frame deletion of <i>pmgM</i> in P1CMclr100                                                                                                                          | This Work                                             |
| P1 $\Delta$ <i>pmgN</i>             | In-frame deletion of <i>pmgN</i> in P1CMclr100                                                                                                                          | This Work                                             |
| P1 $\Delta$ <i>pmgO</i>             | In-frame deletion of <i>pmgO</i> in P1CMclr100                                                                                                                          | This Work                                             |
| P1 $\Delta$ <i>pmgP</i>             | In-frame deletion of <i>pmgP</i> in P1CMclr100                                                                                                                          | This Work                                             |
| P1 $\Delta$ <i>pmgQ</i>             | In-frame deletion of <i>pmgQ</i> in P1CMclr100                                                                                                                          | This Work                                             |
| P1 $\Delta$ <i>pmgS</i>             | In-frame deletion of <i>pmgS</i> in P1CMclr100                                                                                                                          | This Work                                             |
| P1 $\Delta$ <i>pmgT</i>             | In-frame deletion of <i>pmgT</i> in P1CMclr100                                                                                                                          | This Work                                             |
| P1 $\Delta$ <i>pmgU</i>             | In-frame deletion of <i>pmgU</i> in P1CMclr100                                                                                                                          | This Work                                             |
| P1 $\Delta$ <i>pmgV</i>             | In-frame deletion of <i>pmgV</i> in P1CMclr100                                                                                                                          | This Work                                             |
| P1 $\Delta$ <i>upfA</i>             | In-frame deletion of <i>upfA</i> in P1CMclr100                                                                                                                          | This Work                                             |
| P1 $\Delta$ <i>upfB</i>             | In-frame deletion of <i>upfB</i> in P1CMclr100                                                                                                                          | This Work                                             |
| P1 $\Delta$ <i>upfC</i>             | In-frame deletion of <i>upfC</i> in P1CMclr100                                                                                                                          | This Work                                             |
| P1 $\Delta$ <i>upfM</i>             | In-frame deletion of <i>upfM</i> in P1CMclr100                                                                                                                          | This Work                                             |

|                         |                                                               |                                |
|-------------------------|---------------------------------------------------------------|--------------------------------|
| P1 $\Delta$ <i>upfN</i> | In-frame deletion of <i>upfN</i> in P1CM <i>clr</i> 100       | This Work                      |
| P1 $\Delta$ <i>upfO</i> | In-frame deletion of <i>upfO</i> in P1CM <i>clr</i> 100       | This Work                      |
| P1 $\Delta$ <i>pdca</i> | In-frame deletion of <i>pdca</i> in P1CM <i>clr</i> 100       | This Work                      |
| P1 $\Delta$ <i>pdcb</i> | In-frame deletion of <i>pdcb</i> in P1CM <i>clr</i> 100       | This Work                      |
| P1 $\Delta$ <i>prt</i>  | In-frame deletion of <i>prt</i> in P1CM <i>clr</i> 100        | This Work                      |
| P1 $\Delta$ <i>pro</i>  | In-frame deletion of <i>pro</i> in P1CM <i>clr</i> 100        | This Work                      |
| P1 $\Delta$ <i>uhr</i>  | In-frame deletion of <i>uhr</i> in P1CM <i>clr</i> 100        | This Work                      |
| P1 $\Delta$ <i>upl</i>  | In-frame deletion of <i>upl</i> in P1CM <i>clr</i> 100        | This Work                      |
| P1 $\Delta$ <i>dbn</i>  | In-frame deletion of <i>dbn</i> in P1CM <i>clr</i> 100        | This Work                      |
| P1 $\Delta$ <i>ppp</i>  | In-frame deletion of <i>ppp</i> in P1CM <i>clr</i> 100        | This Work                      |
| P1 $\Delta$ <i>pap</i>  | In-frame deletion of <i>pap</i> in P1CM <i>clr</i> 100        | This Work                      |
|                         |                                                               |                                |
| <b>Plasmids</b>         |                                                               |                                |
| pBAD24                  | Empty cloning vector                                          | Piya et al., 2017              |
| pBAD24g                 | pBAD24 with gentamicin marker replacing ampicillin marker     | This Work                      |
| ppmgA                   | P1 <i>pmgA</i> cloned into pBAD24g                            | This Work                      |
| ppmgB                   | P1 <i>pmgB</i> cloned into pBAD24g                            | This Work                      |
| ppmgC                   | P1 <i>pmgC</i> cloned into pBAD24g                            | This Work                      |
| ppmgG                   | P1 <i>pmgG</i> cloned into pBAD24g                            | This Work                      |
| ppmgR                   | P1 <i>pmgR</i> cloned into pBAD24g                            | This Work                      |
| pdarB $\Delta$ 1-4      | P1 <i>darB</i> missing the first 4 codons cloned into pBAD24  | This Work                      |
| pdarB $\Delta$ 1-9      | P1 <i>darB</i> missing the first 9 codons cloned into pBAD24  | This Work                      |
| pdarB $\Delta$ 1-14     | P1 <i>darB</i> missing the first 14 codons cloned into pBAD24 | This Work                      |
| pdarB $\Delta$ 1-19     | P1 <i>darB</i> missing the first 19 codons cloned into pBAD24 | This Work                      |
| pdarB $\Delta$ 6-30     | P1 <i>darB</i> missing codons 6-30 cloned into pBAD24         | This Work                      |
| pdarB $\Delta$ 11-30    | P1 <i>darB</i> missing codons 11-30 cloned into pBAD24        | This Work                      |
| pdarB $\Delta$ 16-30    | P1 <i>darB</i> missing codons 16-30 cloned into pBAD24        | This Work                      |
| pdarB $\Delta$ 21-30    | P1 <i>darB</i> missing codons 21-30 cloned into pBAD24        |                                |
| pFTSKi-tetR-mCherry     | Template for PCR amplification of <i>tetR-mCherry</i>         | (Shao et al., 2017) / Zeng Lab |
| pBAD24_N30              | The first 30 amino acids of <i>darB</i> cloned into pBAD24    | This Work                      |

|                         |                                                                                |                     |
|-------------------------|--------------------------------------------------------------------------------|---------------------|
| pBAD24_N9               | The first 9 amino acids of <i>darB</i> cloned into pBAD24                      | This Work           |
| pBAD24_N30-tetR-mCherry | mCherry fused to the first 30 amino acids of P1 <i>darB</i> cloned into pBAD24 | This Work           |
| pBAD24_N9-tetR-mCherry  | mCherry fused to the first 9 amino acids of P1 <i>darB</i> cloned into pBAD24  |                     |
| pBAD24_tetR-mCherry     | pBAD24 expressing tetR-mCherry alone                                           |                     |
| pMB838 cassette         | source of gentamicin resistance                                                | Addgene / Lab stock |

**Supplementary Table S2.** Primers and synthetic DNA fragments

| Forward 5'-3'                                                               | Reverse 3'-5'                                                                       | Use                                    |
|-----------------------------------------------------------------------------|-------------------------------------------------------------------------------------|----------------------------------------|
| tcaattgatgatccgttgatgaat gactacgcgagagttgattgatgg<br>ccgtgtaggctggagctgcttc | ctgtctttagtcggtgtgttt<br>tactcatagcaccacgtcctgt<br>gtgataatgggaattagccatg<br>gtcc   | Knockout <i>pmgA</i><br>from P1 genome |
| gcttcccttctgggcttagtttt tctcttgaattaaggagcaagga<br>tggtaggctggagctgcttc     | ggaaaaacgcataaggattcagt<br>gagcctttcagcgtcctgaatc<br>ggataatgggaattagccatg<br>gtcc  | Knockout <i>pmgB</i><br>from P1 genome |
| gtagaatcggttaacacaccagat tctacgaggtttcaatgacaccac<br>gagtgtaggctggagctgcttc | aagcaacattaagccccatatac<br>agccccctcactcaacatgga<br>tgagaaatgggaattagccatg<br>gtcc  | Knockout <i>pmgC</i><br>from P1 genome |
| ggaactccggccttaacttgaat ggctcctatagcttatggggttta<br>cagtgtaggctggagctgcttc  | agtgttattgtgccccatataa<br>aatccttttactggaacgccc<br>aacaatatgggaattagccatg<br>gtcc   | Knockout <i>pmgG</i><br>from P1 genome |
| atgtacactcatcagctttttat tagagcaatctacaaggtgcacta<br>tggtaggctggagctgcttc    | ttgattggtttgtgctgaagt<br>gatcatttcaaagttccgtatt<br>agcttgatgggaattagccatg<br>gtcc   | Knockout <i>pmgR</i><br>from P1 genome |
| tttttgtgcttaaatcatgtcaa tatagcgaaatttgagcatatta<br>tggtaggctggagctgcttc     | gataattccgggagagcgggttg<br>ggtttttcatgcttttctgcg<br>cagagaatgggaattagccatg<br>gtcc  | Knockout <i>pmgF</i><br>from P1 genome |
| aaatgtatcattctgcccttaagt aggttcttcacgaggaaacaaaat<br>tggtaggctggagctgcttc   | aaactctcctcagtaaagcgc<br>aacataatcagtcacaaatcctgc<br>cggtcgatgggaattagccatg<br>gtcc | Knockout <i>pmgL</i><br>from P1 genome |
| gcaaaacagcgtaaataatggcatg cgaccggcaggatttgactgatta<br>tggtaggctggagctgcttc  | agcgcacatgcactaattaatt<br>tattatttaagcagcatacaa<br>ccacttatgggaattagccatg<br>gtcc   | Knockout <i>pmgM</i><br>from P1 genome |
| catgtgcgctcttgtgtagtgc actttaacatcgggagaataatcg<br>tggtaggctggagctgcttc     | agctgcaaattcagcctccagg<br>cgagcattcattcagcgatta<br>cagggtatgggaattagccatg<br>gtcc   | Knockout <i>pmgN</i><br>from P1 genome |

|                                                                             |                                                                                   |                                        |
|-----------------------------------------------------------------------------|-----------------------------------------------------------------------------------|----------------------------------------|
| gctgaattgcagctgagaatgaa cataccacccagggcgactaggac<br>tggtaggctggagctgcttc    | ctgcctctaaattattcttgg<br>gaaacattgaattgcactgctc<br>ctacttatgggaattagccatg<br>gtcc | Knockout <i>pmgO</i><br>from P1 genome |
| gcgagtgccgattatagcggta atggggccatcgactggcttaacc<br>gcgtgtaggctggagctgcttc   | gtgggtgctatcatgtattctt<br>cagccattcttaagagtcac<br>tgcggaatgggaattagccatg<br>gtcc  | Knockout <i>pmgP</i><br>from P1 genome |
| ggaaacctgacattgatgaaagt aaaggtgatggtgcagcatgaaga<br>tggtaggctggagctgcttc    | ttaaaaatatggaattattag<br>agcaatattattctgattctcg<br>ctcaaatgggaattagccatg<br>gtcc  | Knockout <i>pmgQ</i><br>from P1 genome |
| atacttaggaaaaatgaccgaagc acaagctaatacggaaacttgaaa<br>tggtaggctggagctgcttc   | caccagcattaaaagtgaact<br>gtaactatcagcgaacgtaaat<br>agtccatgggaattagccatg<br>gtcc  | Knockout <i>pmgS</i><br>from P1 genome |
| tctctatcacttttggcggcatcg tcgcatggttaagggggatgca<br>tggtaggctggagctgcttc     | aatgtccgcatagtgtccagcc<br>tcgtaaccagggttagcact<br>ccagctatgggaattagccatg<br>gtcc  | Knockout <i>pmgT</i><br>from P1 genome |
| ttattacgccagatcatcataaac aagccgagaaaagtgaactagaaa<br>gggtgtaggctggagctgcttc | agggtttgatgtgatctgcaa<br>ctctcatactcaccctcgctt<br>gtatcgatgggaattagccatg<br>gtcc  | Knockout <i>pmgU</i><br>from P1 genome |
| ttgccgttggtgatgctggcgat acaagcgagggtgaagtatgagag<br>tggtaggctggagctgcttc    | ttctgatgtgctggtgggtac<br>ctgtagttcagcttctgtggc<br>atttaaatgggaattagccatg<br>gtcc  | Knockout <i>pmgV</i><br>from P1 genome |
| gttaatgattacaaccgagctatt agcggtaactaaaagggatttta<br>tggtaggctggagctgcttc    | ccaacgtagccggttgaaggg<br>agtcgtattattctacgcttc<br>gatgagatgggaattagccatg<br>gtcc  | Knockout <i>upfA</i><br>from P1 genome |
| gagacggcctagttcaggttaagt aggagatatcatgctggaaaaaga<br>ctgttaggctggagctgcttc  | tgaagaaaaattatcaatgaag<br>tccttgttactgtgccgctt<br>gtttaaattgggaattagccatg<br>gtcc | Knockout <i>upfB</i><br>from P1 genome |
| aatctaagttaaaataacgaaaat cagagcaaatcattggtgatgacg<br>tggtaggctggagctgcttc   | cgtctccggtgcaacggtaga<br>gccgcatgaaacaggatcacca<br>acgcatatgggaattagccatg<br>gtcc | Knockout <i>upfC</i><br>from P1 genome |
| gatgaggataatagccagaatctg gctaataacaggcgcatctaaaaa<br>tggtaggctggagctgcttc   | tgccgtaagctcacgttaacga<br>cttctttcaccgaatccaact<br>atataaatgggaattagccatg<br>gtcc | Knockout <i>upfM</i><br>from P1 genome |
| aaaccaacccttatatagttgga ttcggtgaaagaaagtcgttaacg<br>tggtaggctggagctgcttc    | acaaagttagcacttgcaaga<br>gggccattttctaaatatttg<br>atgttatgggaattagccatg<br>gtcc   | Knockout <i>upfN</i><br>from P1 genome |
| gaaacatcacatatttagaaaaat ggccctcttgaagtcataact<br>tggtaggctggagctgcttc      | tcccatccagaataattgagta<br>acgactattttaaccagcaa<br>agtaacatgggaattagccatg<br>gtcc  | Knockout <i>upfO</i><br>from P1 genome |

|                                                                             |                                                                                    |                                                        |
|-----------------------------------------------------------------------------|------------------------------------------------------------------------------------|--------------------------------------------------------|
| tctgtcgccgacacgttacgtaga ttgatgggtctgcggagtagatt<br>aagtgtaggctggagctgcttc  | acatcacacctttaactactga<br>ttgggctttatctgctgcccgg<br>cattctatgggaattagccatg<br>gtcc | Knockout <i>pdca</i> from P1 genome                    |
| gaatgccgggcagcagataaagcc caatcagtgattaaaggtgtgatg<br>tgggtaggctggagctgcttc  | taaagaatatagcaatacattag<br>agcaattttatcaactcga<br>cgaatgatgggaattagccatg<br>gtcc   | Knockout <i>pdcb</i> from P1 genome                    |
| aaattccgttcaaacacgatgtga attattctaattaaggtgcaatct<br>tgggtaggctggagctgcttc  | tcagtgaccgttttcaaaacat<br>cagtcattatcgttccctctt<br>taaagaatgggaattagccatg<br>gtcc  | Knockout <i>prt</i> from P1 genome                     |
| aaatccttgaatcggtctttaag agggaaacgataatgactgatgtt<br>tgggtaggctggagctgcttc   | tttgggtgtatttaaacggat<br>tgattgaattattaaacgtgat<br>gatgctatgggaattagccatg<br>gtcc  | Knockout <i>pro</i> from P1 genome                     |
| accattcagccatcgccctcaat gggcatttggtagctgcgaga<br>tgggtaggctggagctgcttc      | atagtaatgttttccagtgt<br>taaacaatgttaaccctgaa<br>tatcaaatgggaattagccatg<br>gtcc     | Knockout <i>uhr</i> from P1 genome                     |
| ttcaccgcaacggaaagagcattc ctggtggacctgtagattgggata<br>tgggtaggctggagctgcttc  | tgggaatgcacaggctgatgt<br>gccgcaactacagtagtgcgcg<br>ctttgatgggaattagccatg<br>gtcc   | Knockout <i>upl</i> from P1 genome                     |
| cggtttgataactatgccggtgct gactggcaagaggattattaatgc<br>aagtgtaggctggagctgcttc | ggcttttctgttatgacgggtt<br>caatttttatccgttaccgcg<br>cgacggatgggaattagccatg<br>gtcc  | Knockout <i>dbn</i> from P1 genome                     |
| ggtattccgcagatgactcttaaa gaatggctgaagaatacatgatag<br>cagtgtaggctggagctgcttc | ccagagcgaagaactaaagcaa<br>tcttcatgctgcaccatcacct<br>ttcactatgggaattagccatg<br>gtcc | Knockout <i>ppp</i> from P1 genome                     |
| ggtggagtgcgcccaccagcattt tttctccaatgaggagggcatt<br>tgggtaggctggagctgcttc    | gttttaaaaatcaagatttatt<br>agagcaattattgtgatgaag<br>aagcgcatgggaattagccatg<br>gtcc  | Knockout <i>pap</i> from P1 genome                     |
| atcggacgtcatgttacgcagcag caacgatg                                           | atcggagctcttaggtggcgg<br>acttgggtc                                                 | PCR amplify gentamicin resistance cassette from pMB838 |
| atcggagctcctgtcagaccaagt ttactcatatatactttagattg                            | atcggagctcactcttctttt<br>tcaatattattgaag                                           | PCR amplify pBAD24 backbone                            |
| ggggatcctctagaataaaggagg tcagtacatggccaataataacga<br>aattgatcc              | aaaacagccaagctttcatagc<br>accacgtcctg                                              | clone <i>pmgA</i> into pBAD24g                         |
| ggggatcctctagaataaaggagg gatgctaagtctttacccctttt ccc                        | aaacagccaagctttcagcgtc<br>ctgaatcgg                                                | clone <i>pmgB</i> into pBAD24g                         |
| ggggatcctctagaataaaggagg gatgctaataacaccacgacaatt<br>actc                   | aaacagccaagctttcacttca<br>acatggatgagaaaag                                         | clone <i>pmgC</i> into pBAD24g                         |
| ggggatcctctagaataaaggagg gatgctaattggctcctatagctta<br>tggg                  | aaacagccaagcttttactgga<br>acgcccga                                                 | clone <i>pmgG</i> into pBAD24g                         |

|                                                                                                                                                                                                                                                                                               |                                         |                                                                                                                      |
|-----------------------------------------------------------------------------------------------------------------------------------------------------------------------------------------------------------------------------------------------------------------------------------------------|-----------------------------------------|----------------------------------------------------------------------------------------------------------------------|
| ggggatcctctagaataaaggagg gatgctaattgtggccattccgacg                                                                                                                                                                                                                                            | aaacagccaagctttcaaagtt<br>ccgtattagcttg | clone <i>pmgR</i> into<br>pBAD24g                                                                                    |
| atcgtctagagtaataaaggaggt atcgagatgtctatgggggtgtt<br>cgctg                                                                                                                                                                                                                                     | atcgaagctttatgcgtattg<br>ttggatgacggc   | Truncate the N<br>terminal region of<br>DarB by amino<br>acids 4                                                     |
| atcgtctagagtaataaaggaggt atcgagatgcgctgttcaagtgc<br>agcg                                                                                                                                                                                                                                      | atcgaagctttatgcgtattg<br>ttggatgacggc   | Truncate the N<br>terminal region of<br>DarB by amino<br>acids 9                                                     |
| atcgtctagagtaataaaggaggt atcgagatgagcgaaatattgaaa<br>tacattagggc                                                                                                                                                                                                                              | atcgaagctttatgcgtattg<br>ttggatgacggc   | Truncate the N<br>terminal region of<br>DarB by amino<br>acids 14                                                    |
| atcgtctagagtaataaaggaggt atcgagatgtacattagggcaata<br>acatctcaccg                                                                                                                                                                                                                              | atcgaagctttatgcgtattg<br>ttggatgacggc   | Truncate the N<br>terminal region of<br>DarB by amino<br>acids 19                                                    |
| attaaatacggcgtggaaaagg                                                                                                                                                                                                                                                                        | agatagctgttcatatcgatacct                | Internal deletion of<br>amino acids 6-30<br>of DarB                                                                  |
| attaaatacggcgtggaaaagg                                                                                                                                                                                                                                                                        | gcgaaacacccccataga                      | Internal deletion of<br>amino acids 11-30<br>of DarB                                                                 |
| attaaatacggcgtggaaaagg                                                                                                                                                                                                                                                                        | gctgacactgaacagcg                       | Internal deletion of<br>amino acids 16-30<br>of DarB                                                                 |
| attaaatacggcgtggaaaagg                                                                                                                                                                                                                                                                        | gtatttcaatatttcgctgacacttg              | Internal deletion of<br>amino acids 21-30<br>of DarB                                                                 |
| actctctactgtttctccataccc g                                                                                                                                                                                                                                                                    | tgtatcaggctgaaaatcttct<br>ctcatc        | PCR amplify<br>synthetic DNA<br>fragments<br>designed to<br>introduce N-<br>terminal DarB<br>residues into<br>pBAD24 |
| atcgagaattcgtgtctagattag ataaaagtaaagtattaacagcg                                                                                                                                                                                                                                              | atcgaggtaccttactgtaca<br>gctcgtccatgc   | Clone mCherry to<br>pBAD24_ <i>darBN30</i>                                                                           |
| Synthetic DNA Fragments 5'-3'                                                                                                                                                                                                                                                                 |                                         |                                                                                                                      |
| gacgcttttatcgcaactctctactgtttctccatacccggtttttt<br>gggctagcaggaggttaatacacccatgaacaagctatctatgggggtgt<br>ttcgctgttcaagtgtcagcgaaatattgaaatacattagggcaataa<br>catctcaccgagcgccggaattcaccatggtacccggggatcctctag<br>agtcgacctgcaggcatgcaagctggctgttttgccgatgagagaa<br>gatttcagcctgatacagattaaatc |                                         | Synthetic DNA<br>fragment to<br>introduce 30 N-<br>terminal DarB<br>residues into<br>pBAD24                          |

**Supplementary Table S3.** EOPs of phage P1 single-gene knockouts. Phage mutants were induced from lysogens in the restrictionless WA921 and plated to *E. coli* strains expressing *EcoA*, *EcoB* and *EcoK*. The restriction phenotype was compared to the parental P1 as described previously in Piya *et al.* 2017. Six phage mutants did not produce viable P1 phages upon induction, denoted as “PFU/mL <10<sup>2</sup>”. All other knockouts produced infectious virions and showed a restriction phenotype similar to that of the parental P1 (see Supplementary Figure S1).

| Gene Knockout | Plating Phenotype        |
|---------------|--------------------------|
| <i>pacA</i>   | PFU/mL < 10 <sup>2</sup> |
| <i>pmgA</i>   | PFU/mL < 10 <sup>2</sup> |
| <i>pmgB</i>   | PFU/mL <10 <sup>2</sup>  |
| <i>pmgC</i>   | PFU/mL <10 <sup>2</sup>  |
| <i>pmgG</i>   | PFU/mL <10 <sup>2</sup>  |
| <i>pmgR</i>   | PFU/mL <10 <sup>2</sup>  |
| <i>upfA</i>   | normal restriction       |
| <i>upfB</i>   | normal restriction       |
| <i>upfC</i>   | normal restriction       |
| <i>uhr</i>    | normal restriction       |
| <i>upl</i>    | normal restriction       |
| <i>dbn</i>    | normal restriction       |
| <i>pmgL</i>   | normal restriction       |
| <i>pmgM</i>   | normal restriction       |
| <i>pmgN</i>   | normal restriction       |
| <i>pmgO</i>   | normal restriction       |
| <i>pmgP</i>   | normal restriction       |
| <i>ppp</i>    | normal restriction       |
| <i>pmgQ</i>   | normal restriction       |
| <i>pmgS</i>   | normal restriction       |
| <i>pap</i>    | normal restriction       |
| <i>pmgT</i>   | normal restriction       |
| <i>pmgU</i>   | normal restriction       |
| <i>pmgV</i>   | normal restriction       |
| <i>upfM</i>   | normal restriction       |
| <i>upfN</i>   | normal restriction       |
| <i>upfO</i>   | normal restriction       |

|             |                    |
|-------------|--------------------|
| <i>pdca</i> | normal restriction |
| <i>pdcb</i> | normal restriction |



**Supplementary Table S4.** Results of HHPred searches for P1 proteins identified as virion-associated by LC-MS/MS analysis or essential by genetic knockouts. Proteins Gp7, Gp25 and Gp16 did not return high-quality matches in HHPred and their functions remain unknown.

|                                            | <b>P1<br/>protein</b> | <b>Match<br/>accession</b> | <b>Probability<br/>(%)</b> | <b>Function</b>                                                                                                                     | <b>PMID</b>     |
|--------------------------------------------|-----------------------|----------------------------|----------------------------|-------------------------------------------------------------------------------------------------------------------------------------|-----------------|
| <b>Proteins identified by<br/>LC-MS/MS</b> |                       |                            |                            |                                                                                                                                     |                 |
|                                            | <b>gp23</b>           | <b>5VF3_L</b>              | <b>100</b>                 | <b>Bacteriophage T4 isometric<br/>capsid</b>                                                                                        | <b>28893988</b> |
|                                            | <b>Prt</b>            | <b>3JA7_B</b>              | <b>100</b>                 | <b>Portal protein gp20; VIRAL<br/>PROTEIN; 3.63A {Enterobacteria<br/>phage T4}</b>                                                  | <b>26144253</b> |
|                                            | <b>Pro</b>            | <b>5JBL_A</b>              | <b>99.44</b>               | <b>Prohead core protein protease;<br/>protease pentamer, phage T4,<br/>prohead, HYDROLASE; 1.943A<br/>{Enterobacteria phage T4}</b> | <b>27667692</b> |
|                                            | <b>DdrB</b>           | <b>ND</b>                  |                            | <b>Antirestriction component</b>                                                                                                    | <b>28509398</b> |
|                                            | <b>DarA</b>           | <b>ND</b>                  |                            | <b>Antirestriction component</b>                                                                                                    | <b>28509398</b> |
|                                            | <b>DarB</b>           | <b>ND</b>                  |                            | <b>Antirestriction component</b>                                                                                                    | <b>28509398</b> |
|                                            | <b>Hdf</b>            | <b>ND</b>                  |                            | <b>Antirestriction component</b>                                                                                                    | <b>28509398</b> |

|  |      |              |       |                                                                                                                          |          |
|--|------|--------------|-------|--------------------------------------------------------------------------------------------------------------------------|----------|
|  | DdrA | ND           |       | Antirestriction component                                                                                                | 28509398 |
|  | Ulx  | ND           |       | Antirestriction component                                                                                                | 28509398 |
|  | gp22 | 3J2M_Y       | 100   | Tail sheath protein Gp18; bacteriophage T4, phage tail terminator protein, phage sheath protein, VIRAL PROTEIN; 15.0A {E | 23434847 |
|  | Tub  | 5IV5_IB      | 99.94 | Tail tube protein gp19; T4, baseplate-tail tube complex, pre-attachment, bacteriophage, bacterial virus, hexagonal, memb | 27193680 |
|  | gp6  | 1WTH_D       | 99.06 | Baseplate structural protein Gp27; Triple-stranded beta-helix, OB fold, pseudohexamer, T4 tail lysozyme, HUB, gp5-gp27,  | 15701513 |
|  | gp7  | None<br>>50% |       |                                                                                                                          |          |
|  | gp25 | None<br>>50% |       |                                                                                                                          |          |

|  |      |           |       |                                                                                                                          |          |
|--|------|-----------|-------|--------------------------------------------------------------------------------------------------------------------------|----------|
|  | Sit  | 5OHU_A    | 98.92 | Soluble lytic murein transglycosylase; Lytic Transglycosylase, LYASE; HET: PO4; 2.2A {Pseudomonas aeruginosa}            | 29632171 |
|  | BpIA | 5HX2_D    | 100   | Baseplate wedge protein gp6; T4, baseplate, complex, VIRAL PROTEIN; 3.8A                                                 | 26929357 |
|  | S    | 5YVQ_A    | 99.45 | Tail fiber protein S; bacteriophage, VIRAL PROTEIN; HET: GOL; 2.103A {Escherichia phage Mu}                              | 31209305 |
|  | R    | 6HHK_C    | 98.72 | Gp105; bacteriophage baseplate protein, VIRAL PROTEIN; HET: MSE; 2.38A {Listeria phage A511}                             | 30606715 |
|  | gp24 | 4HUD_C    | 94.58 | Tail connector protein Gp15; Bacteriophage T4, phage tail terminator protein, gp15, VIRAL PROTEIN; 2.7001A {Enterobacter | 23434847 |
|  | gp16 | None >50% |       |                                                                                                                          |          |

|                                                                 |      |           |       |                                                                                                                          |          |
|-----------------------------------------------------------------|------|-----------|-------|--------------------------------------------------------------------------------------------------------------------------|----------|
|                                                                 | BplB | 5IV5_IB   | 99.79 | Tail tube protein gp19; T4, baseplate-tail tube complex, pre-attachment, bacteriophage, bacterial virus, hexagonal, memb | 27193680 |
|                                                                 | PmgC | 7BOX_N    | 87.4  | T7 gp11 tail adaptor                                                                                                     | 32266588 |
|                                                                 | PmgG | 5IV5_r    | 97.3  | T4 tail tube assembly protein gp48; baseplate-tail tube junction                                                         | 27193680 |
|                                                                 |      |           |       |                                                                                                                          |          |
| Additional proteins identified as essential                     |      |           |       |                                                                                                                          |          |
|                                                                 | PmgA | 5IW9_B    | 99.4% | T4 gp25 inner baseplate wedge, initiator of sheath polymerization                                                        | 27193680 |
|                                                                 | PmgB | None >50% |       | Tape measure chaperone?                                                                                                  |          |
|                                                                 | PmgR | None >50% |       |                                                                                                                          |          |
|                                                                 |      |           |       |                                                                                                                          |          |
| Other proteins with bioinformatically assigned structural roles |      |           |       |                                                                                                                          |          |

|  |             |               |               |                                            |  |
|--|-------------|---------------|---------------|--------------------------------------------|--|
|  | <b>UpfC</b> | <b>4KU0_D</b> | <b>99.4%</b>  | <b>T4 gp5.4 baseplate needle structure</b> |  |
|  | <b>gp5</b>  | <b>1WTH_A</b> | <b>99.67%</b> | <b>T4 gp5 tail needle</b>                  |  |
|  | <b>gp26</b> | <b>5HX2_F</b> | <b>98.9%</b>  | <b>T4 gp53 wegde component</b>             |  |

**Supplementary Table S5.** Baseplate components of coliphage T4 compared to baseplate components identified in phage P1. Functions of P1 proteins were predicted using HHPred at default settings. Detection of the P1 protein by LC-MS/MS of purified P1 virions is also shown (see Table 1). Nine P1 proteins with orthologs to T4 baseplate components were identified, most of these are in the baseplate core. P1 proteins with no matches in HHPred are denoted with dashes (--). T4 proteins and their functions are adapted from Taylor et al. 2016 (PMID 7193680).

| T4 protein                        |       | T4 function                  | P1 ortholog | HHPred result        |               | Detected in LC-MS/MS |
|-----------------------------------|-------|------------------------------|-------------|----------------------|---------------|----------------------|
|                                   |       |                              |             | Structure/<br>domain | % Probability |                      |
| <b>Baseplate core proteins</b>    |       |                              |             |                      |               |                      |
|                                   | gp5.4 | Spike tip                    | UpfC        | 4KU0_D               | 99.4%         | No                   |
|                                   | gp5   | Hub, needle, tail lysozyme   | gp5         | 1WTH_A               | 99.67%        | No                   |
|                                   | gp6   | Wedge                        | BplA        | 5HX2_D               | 100           | Yes                  |
|                                   | gp7   | Wedge                        | --          | --                   | --            | --                   |
|                                   | gp25  | Wedge                        | PmgA        | 5IW9_B               | 99.4%         | No                   |
|                                   | gp27  | Hub                          | gp6         | 1WTH_D               | 99.06         | Yes                  |
|                                   | gp48  | Baseplate-tail tube junction | PmgG        | 5IV5_r               | 97.3          | Yes                  |
|                                   | gp53  | Wedge                        | gp26        | 5HX2_F               | 98.9%         | No                   |
|                                   |       |                              |             |                      |               |                      |
| <b>Baseplate other components</b> |       |                              |             |                      |               |                      |

|                                        |      |                              |     |        |       |     |
|----------------------------------------|------|------------------------------|-----|--------|-------|-----|
|                                        | gp8  | Wedge                        | R   | 6HHK_C | 98.72 | Yes |
|                                        | gp29 | Hub, tape measure            | Sit | 5OHU_A | 98.92 | Yes |
|                                        | gp54 | Baseplate-tail tube junction | --  | --     | --    | --  |
|                                        |      |                              |     |        |       |     |
| <b>Baseplate tail fiber attachment</b> |      |                              |     |        |       |     |
|                                        | gp9  | Wedge, LTF attachment site   | --  | --     | --    | --  |
|                                        | gp10 | Wedge, STF attachment        | --  | --     | --    | --  |
|                                        | gp11 | Wedge, STF binding interface | --  | --     | --    | --  |
|                                        | gp12 | Baseplate outer rim, STF     | --  | --     | --    | --  |

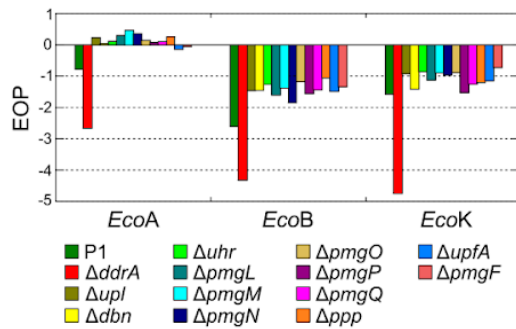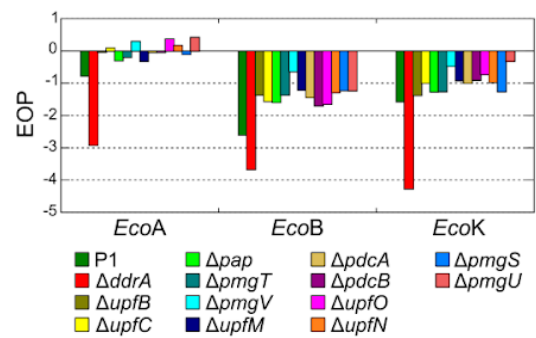

**Supplementary Figure S1.** P1 genes of unknown function are not required for antirestriction. Phage P1 or mutants were lysogenized into restriction-modification deficient *E. coli* strain WA921. The lysogens were thermally induced and tested for plating efficiency in *E. coli* strains with type I EcoA, EcoB or EcoK R-M systems. The EOP of parental P1, with functional antirestriction system is  $\sim 10^{-1}$ ,  $\sim 10^{-3}$  or  $10^{-2}$  in strains with type I EcoA, EcoB or EcoK systems respectively, whereas the EOP of P1 $\Delta ddrA$ , with disrupted antirestriction system, is  $\sim 10^{-3}$ ,  $\sim 10^{-4}$  or  $\sim 10^{-4}$  -  $10^{-5}$  in strains with type I EcoA, EcoB or EcoK systems respectively. The EOP of all other P1 mutants generated in this study appeared normal compared to the EOP of P1 $\Delta ddrA$ , suggesting that these genes do not play any roles in protecting P1 DNA from the type I R-M systems tested in this study.



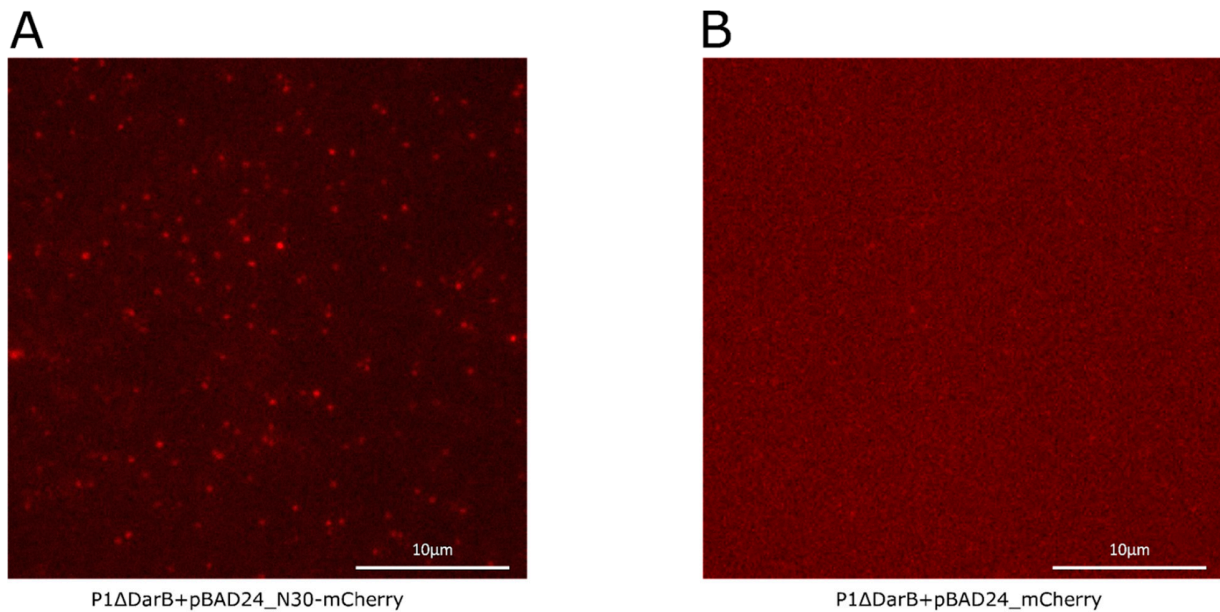

**Supplementary Figure S2.** P1Δ*darB*+pBAD24\_N30-mCherry and P1Δ*darB*+pBAD24\_mCherry virions were purified by side-by-side by CsCl isopycnic centrifugation and applied to slides for observation by fluorescence microscopy. (A) Fluorescence imaging of P1Δ*darB*+pBAD24\_N30-mCherry shows fluorescent foci using the mCherry filter. (B) Fluorescence imaging of P1Δ*darB*+pBAD24\_mCherry shows the absence of fluorescent foci using the same filter. Camera signal gain was set automatically for image capture, therefore the image background is amplified in (B), which appears dark under manual observation.

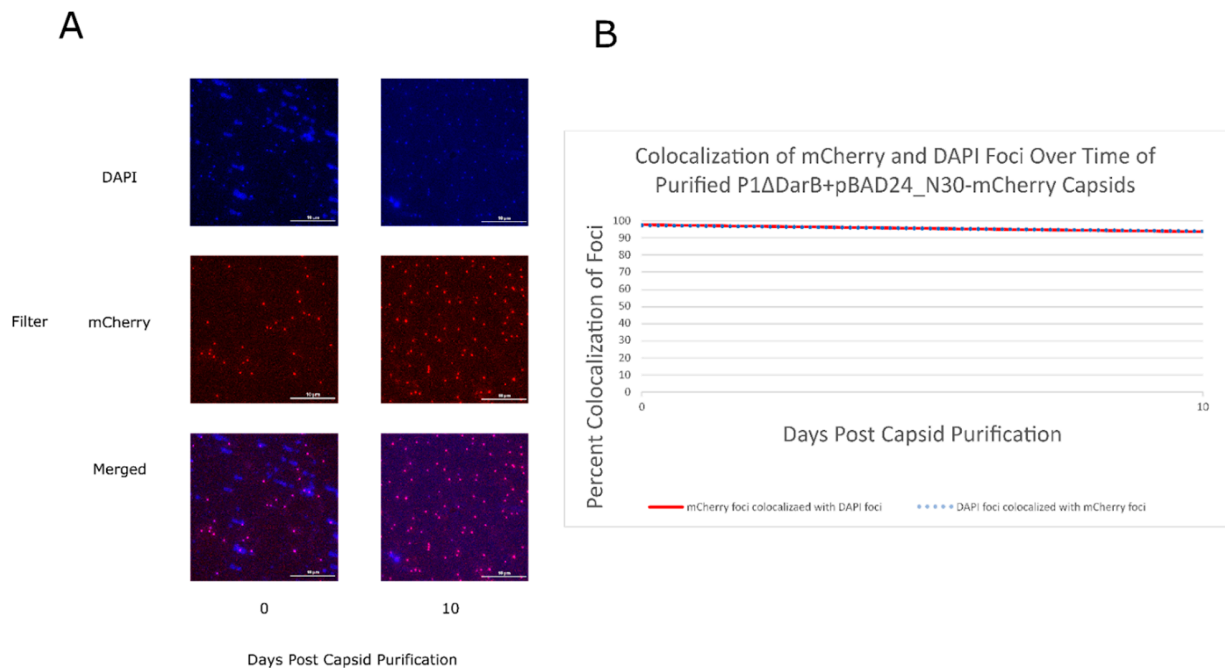

**Supplementary Figure S3.** P1 $\Delta$ *darB* capsids purified by cesium chloride isopycnic centrifugation. (A) The simultaneous induction of the pBAD24\_N30-mCherry expression vector and the P1 $\Delta$ *darB* lysogen results in the localization of mCherry to the P1 capsid. Fluorescence imaging of cesium chloride isopycnic centrifugation P1 $\Delta$ *darB*+pBAD24\_N30-mCherry purified heads on days 0 and 10 are shown using a DAPI filter, mCherry filter, and the two filters merged. (B) The line graph illustrates the colocalization of DAPI and mCherry foci over the 10 days post cesium chloride isopycnic centrifugation of the P1 $\Delta$ *darB*+pBAD24\_N30-mCherry heads. The red line indicates the percent colocalization of mCherry foci and DAPI foci. Here, colocalization of foci occurs when an mCherry foci is observed first, then, secondly, the filter is switched to DAPI and the presence of a DAPI foci overlaps with the initial mCherry foci. The blue dotted line indicates the percent colocalization of DAPI foci and mCherry foci. Here, colocalization of foci occurs when a DAPI foci is observed first, then, secondly, the filter is switched to mCherry and the presence of an mCherry foci overlaps with the initial DAPI foci.
